# Supplementary material
Source: PubMed Central journal article supplement (PMC4755884)
Supplement: NIHMS732215-supplement-1.pdf [file NIHMS732215-supplement-1.pdf]

## Quantitative PCR primers

| Gene           | Forward Primer (5' - 3')    | Reverse Primer (5' - 3')    |
|----------------|-----------------------------|-----------------------------|
| <i>Pdcd1</i>   | TGTGCTGCAGTTGAGCTGGCAATC    | TGCAGGTGAAGGTGGCATTGCTC     |
| <i>Rnf128</i>  | AATTTACGGTGCCACGGTTTGG      | ATTGCAACAATGTCCCCAGCACCC    |
| <i>Nt5e</i>    | CCTGAAGAAGGCTTTTGAGCACAGCG  | ATAGATGGGCACTCGACACTTGGTGC  |
| <i>Folr4</i>   | AGCGTCTGCATGAATTCCAAGCGC    | AACTTGTGGAACGTGTGCAGCAGG    |
| <i>Cblb</i>    | AAGGATGTACGAAGAGCAGTCGCAGG  | TGGAACCTGGCCATTGGGAAAGATCGC |
| <i>Ctla4</i>   | TCCTTGTCGCAGTTAGCTTGGGGTTG  | TCTGGCTCTGTTGGGGGCATTTTCAC  |
| <i>Cxcr5</i>   | ACTGGCCTTCTACAGTAACAGCACGG  | AGGCTGTAGGCCACAGGCATGAATAC  |
| <i>Cxcr4</i>   | AGTCGGCAATGGATTGGTGATCCTG   | AGTGTGATGACAAAGAGGAGGTCAGCC |
| <i>Tnfrsf4</i> | TGGCCACTTTTCTCCAGGCAACAAC   | TTCTGTCCTCACAGACTGCGTCCAAG  |
| <i>Icos</i>    | TGCAGCCTGTCCATTTTTGACCCAC   | AGTACCACAACGAAAGCTGCACACCC  |
| <i>Cd40lg</i>  | CGAAGCCAACAGTAATGCAGCATCCG  | TTGACTCGAAGGCTCCCGATTAGAGC  |
| <i>Cxcr3</i>   | AGTGAACGTCAAGTGCTAGATGCCTCG | GCTGGCAGGAAGGTTCTGTCAAAGTTC |
| <i>Ccr7</i>    | AACCCAGGAAAAACGTGCTGGTGG    | TCCGCACATCCTTCTTGAAGCACACC  |
| <i>Maf</i>     | AGCAGAAGAGGCGGACCCTGAAAA    | GCCGTTGCTCACCAGCTTCTCGTATT  |
| <i>Bcl6</i>    | AAGCCGTACCCCTGTGAAATCTGTGG  | TGGCGCAAATGAAGTCGCAGTTGG    |
| <i>Gata3</i>   | CATTACCACCTATCCGCCCT        | TCACACACTCCCTGCCTTCT        |
| <i>Rorc</i>    | ATGTGGTGGAGTTTGCCAAG        | CAGCTCCACACCACCGTATT        |
| <i>Tbx21</i>   | TGCCTACCAGAACGCAGAGA        | AAACGGCTGGGAACAGGATA        |
| <i>Prdm1</i>   | ACAAGGGTTTTACTCAGCTCGCCAC   | TTGCGTAAACTTGGCAGGGGCACAC   |
| <i>Foxp3</i>   | AAAGGAGAAGCTGGGAGCTATG      | CCTGAGTACTGGTGGCTACGAT      |

## Bisulfite Sequencing Primers

| Gene                   | Forward Primer (5' - 3')   | Reverse Primer (5' - 3')   |
|------------------------|----------------------------|----------------------------|
| <i>Tnfrsf18</i> Exon 5 | GAGGTGTAGTTGTTAGTTGAGGATGT | AACCCCTACTCTACCAAAAATATAA  |
| <i>Ctla4</i> Exon 2    | TGGTGTGGTTAGTAGTTATGGTGT   | AAATTCCACCTTACAAAAATACAATC |
| <i>Ikzf4</i> Intron 1  | TAAGAAATTGGGTGTGGTATATGTA  | TTTCCCCTACTAAACTCCTTAAAC   |
| <i>Foxp3</i> Intron 1  | ATTTGAATTGGATATGGTTTGT     | AACCTTAAACCCCTCTAACATC     |
